# Supplementary material for: Surface enhanced Raman scattering based on Au nanoparticles/layered double hydroxide ultrathin films
Source: Royal Society of Chemistry journal article supplement (doi:10.1039/c4tc02714k), 2015-01-01
Supplement: c4tc02714k1.pdf [file c4tc02714k1.pdf]

**ELECTRONIC SUPPLEMENTARY MATERIAL**

**Surface Enhanced Raman Scattering Based on Au Nanoparticles/  
Layered Double Hydroxide Ultrathin Films**

**Rui Tian, Mingwan Li, Haiyan Teng, Heng Luo, Dongpeng Yan,\* and Min Wei\***

*State Key Laboratory of Chemical Resource Engineering, Beijing University of Chemical  
Technology, Beijing 100029, P. R. China*

\* Corresponding authors. Fax: +86-10-64425385; Tel: +86-10-64412131.

E-mail: yandongpeng001@163.com (D. Yan); weimin@mail.buct.edu.cn (M. Wei)

**LIST OF CONTENTS**

- 1. Morphology of Au NPs.**
- 2. UV-vis absorption spectra of Au NPs colloidal suspension and assembled UTFs.**
- 3. Morphological characterization of (Au@PAAS/LDH)<sub>n</sub> (n=0-10) UTFs.**
- 4. Role of LDH nanosheet recorded by Raman Spectrum.**
- 5. Raman spectra of other analytes drop-casted on glass substrate.**
- 6. Loading and unloading properties of (Au@PAAS/LDH)<sub>n</sub> UTFs.**

## 1. Morphology of Au NPs

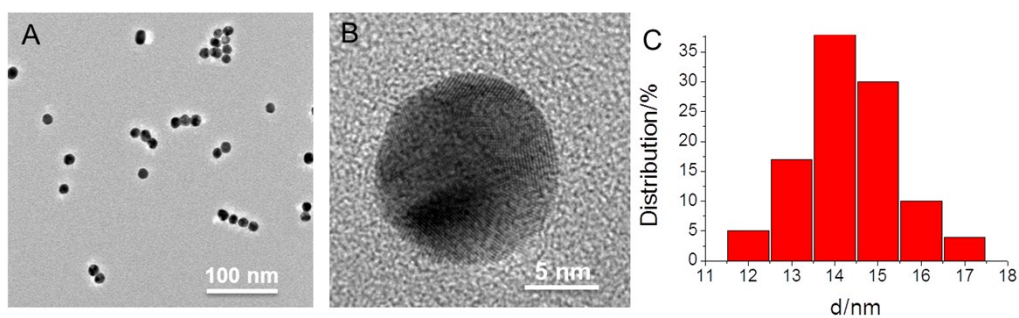

**Fig. S1** High resolution TEM images of Au NPs: (A) low magnification and (B) high magnification (with crystal lattice); (C) size distribution of Au NPs.

## 2. UV-vis absorption spectra of Au NPs colloidal suspension

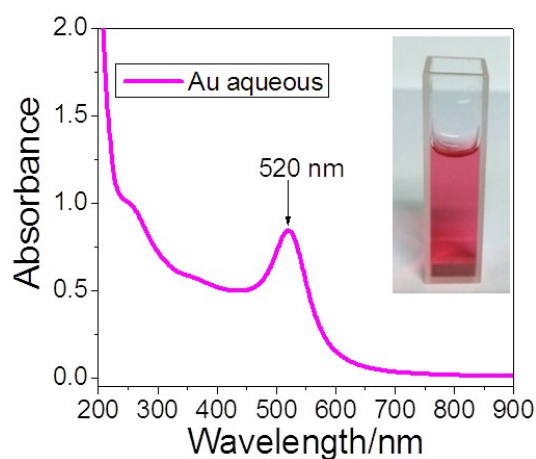

**Fig. S2** UV-vis absorption spectrum of Au NPs colloidal suspension (the inset shows its photographs under daylight).

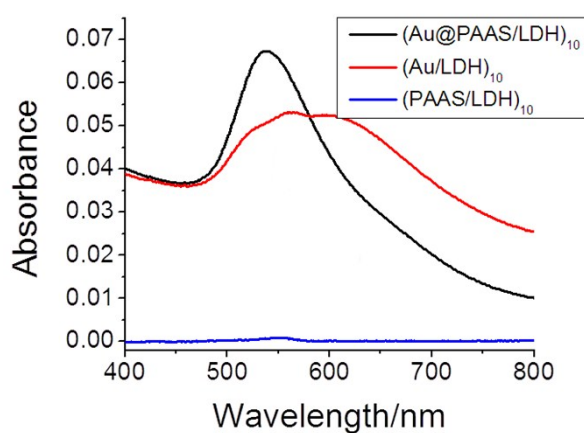

**Fig. S3** Comparison of the UV-vis absorption spectra for (Au@PAAS/LDH)<sub>10</sub> UTF, (Au/LDH)<sub>10</sub> UTF and (PAAS/LDH)<sub>10</sub> UTF.

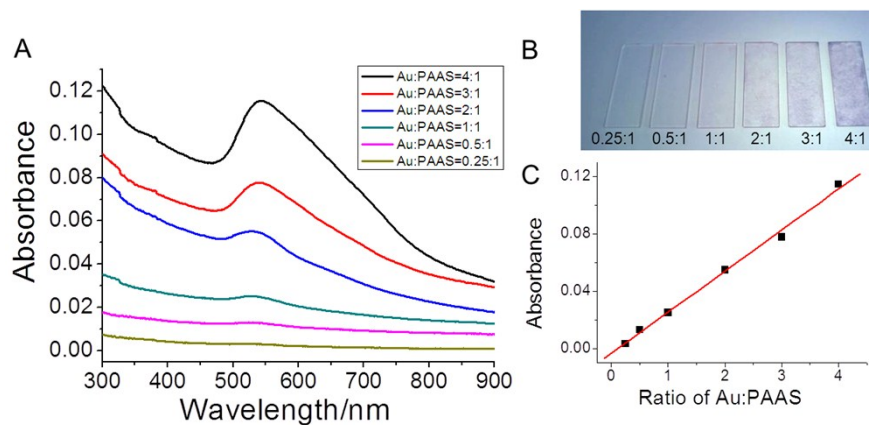

**Fig. S4** Characterization of  $(\text{Au@PAAS})_{10}$  UTFs with different Au/PAA ratio: (A) UV-Vis absorbance of the assembled UTFs, (B) photograph under daylight, (C) the absorbance at 520 nm as a function of ratio.

### 3. Morphological characterization of $(\text{Au@PAAS/LDHs})_n$ ( $n=0-10$ ) UTFs

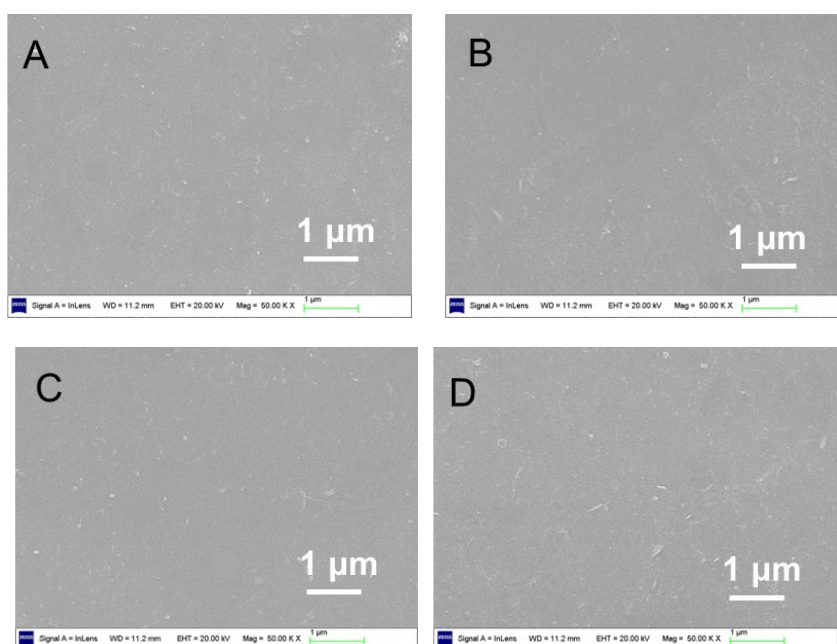

**Fig. S5** Top-view SEM images of  $(\text{Au@PAAS/LDHs})_n$  ( $n=0-10$ ) UTFs, from (A) to (D):  $n=2, 4, 6$  and  $8$ , respectively.

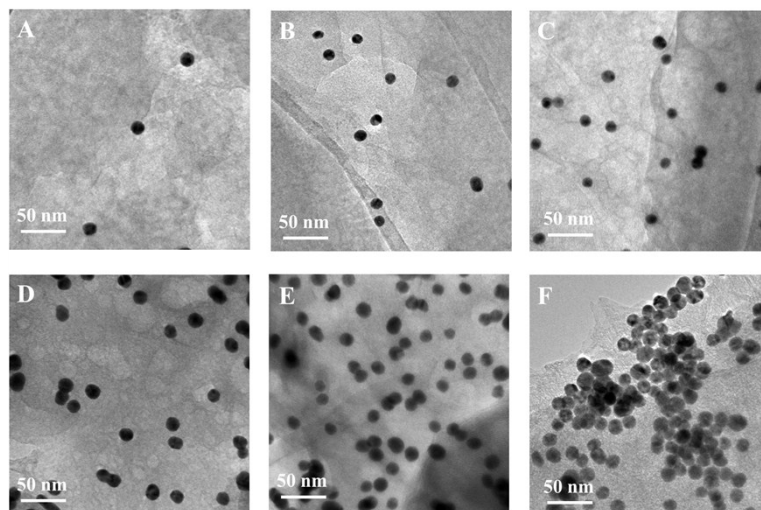

**Fig. S6** TEM images of assembled  $(\text{Au@PAAS/LDH})_{10}$  UTFs at different Au:PAAS ratio at (A) 0.25, (B) 0.5, (C) 1, (D) 2, (E) 3, (F)4.

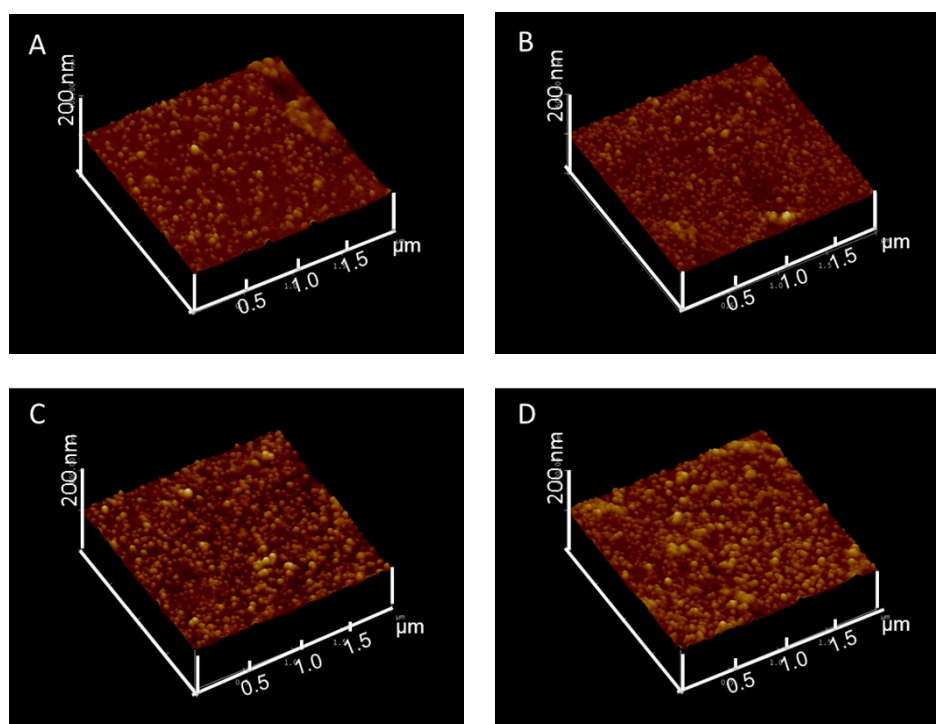

**Fig. S7** Tapping-mode AFM topographical images of  $(\text{Au@PAAS/LDH})_n$  ( $n=0-10$ ) UTFs, from (A) to (D):  $n=2, 4, 6$  and  $8$ , respectively.

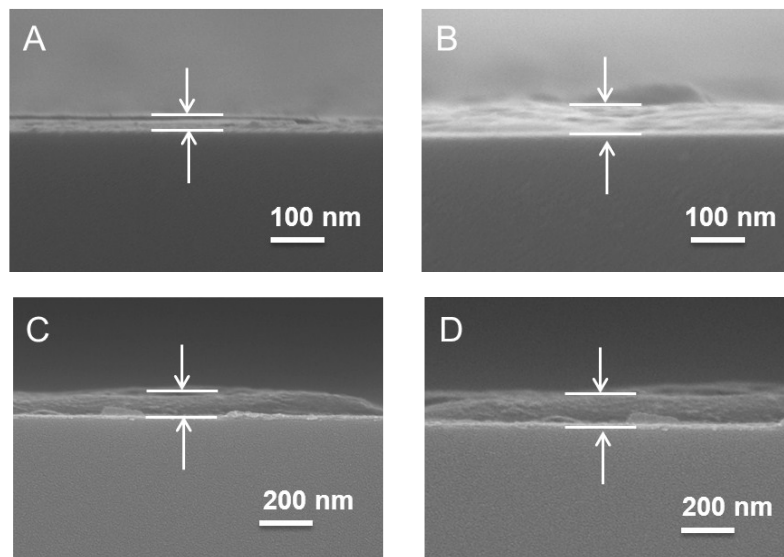

**Fig. S8** Side-view SEM images of  $(\text{Au@PAAS/LDHs})_n$  ( $n=0-10$ ) UTFs, from (A) to (D):  $n=2, 4, 6$  and  $8$ , respectively.

**Table S1** RMS roughness and thickness parameters for  $(\text{Au@PAAS/LDHs})_n$  ( $n=0-10$ ) UTFs with different bilayer number

| $n$                             | 2     | 4     | 6     | 8      | 10     |
|---------------------------------|-------|-------|-------|--------|--------|
| RMS roughness/nm <sup>[a]</sup> | 3.60  | 5.22  | 7.85  | 9.02   | 10.26  |
| SEM thickness/nm <sup>[b]</sup> | ca.33 | ca.63 | ca.98 | ca.130 | ca.166 |

[a] The statistical rms roughness values were obtained by AFM, see Fig. S6.

[b] The SEM thickness values were obtained from the side view of  $(\text{Au@PAAS/LDHs})_n$  UTFs, see Fig. S7.

#### 4. Role of LDH nanosheets recorded by Raman Spectrum

**Table S2** Experimental Raman spectrum of R6G and related assignments

| Raman Shift/cm <sup>-1</sup> | Assignment                        |
|------------------------------|-----------------------------------|
| 609                          | C–C–C ring in-plane bending       |
| 770                          | C–H out-of-plane bending          |
| 1310                         | aromatic C–C stretching vibration |
| 1360                         | aromatic C–C stretching vibration |
| 1508                         | aromatic C–C stretching vibration |
| 1649                         | aromatic C–C stretching vibration |

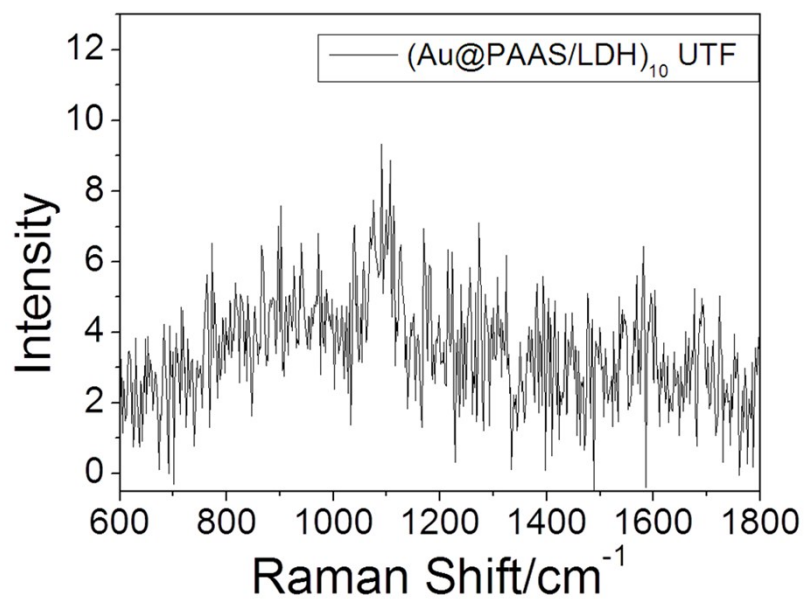

**Fig. S9** Raman spectrum of  $(\text{Au@PAAS/LDH})_{10}$  UTF as a reference sample.

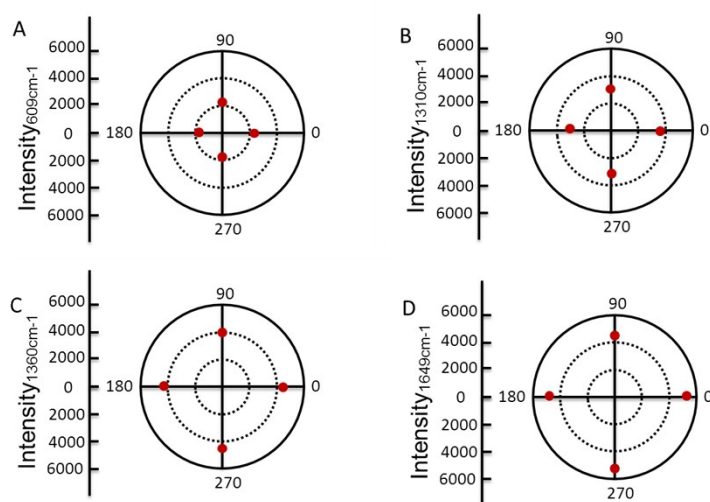

**Fig. S10** Polar plots of the SERS intensity at (A)  $609\text{ cm}^{-1}$ , (B)  $1310\text{ cm}^{-1}$ , (C)  $1360\text{ cm}^{-1}$  and (D)  $1649\text{ cm}^{-1}$  of R6G as a function of polarization angle.

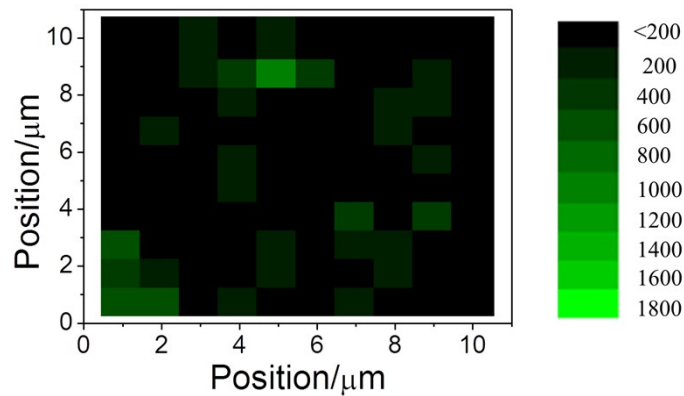

**Fig. S11** Raman mapping of  $(\text{Au/LDH})_{10}$  loaded R6G.

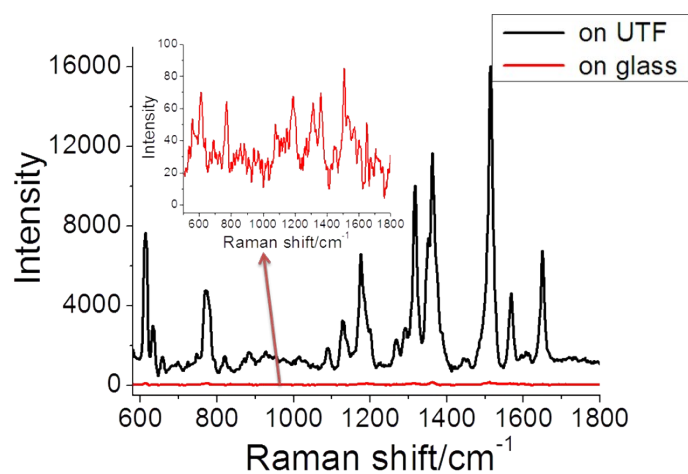

**Fig. S12** SERS spectra of  $10^{-3}$  M R6G recorded on glass and  $(\text{Au@PAAS/LDH})_{10}$  UTF (the inset shows the enlarged spectrum of R6G on glass).

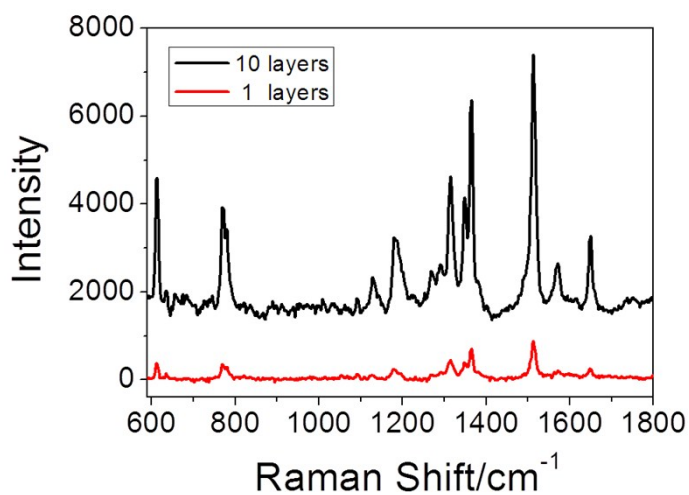

**Fig. S13** SERS spectra of  $(\text{Au@PAAS/LDH})_n$  at single layer and multilayer.



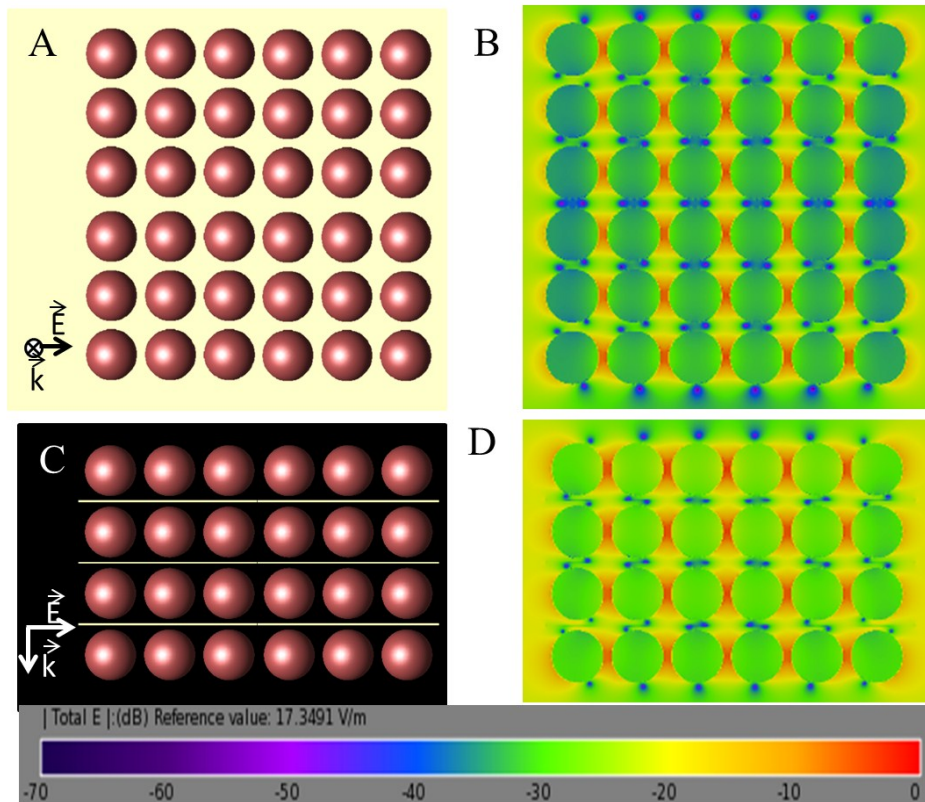

**Fig. S14** FDTD model of in (A)  $x$ - $y$  and (C)  $x$ - $z$  plane; and calculated spatial distribution of the electric field intensity for (B)  $x$ - $y$  and (D)  $x$ - $z$  plane.

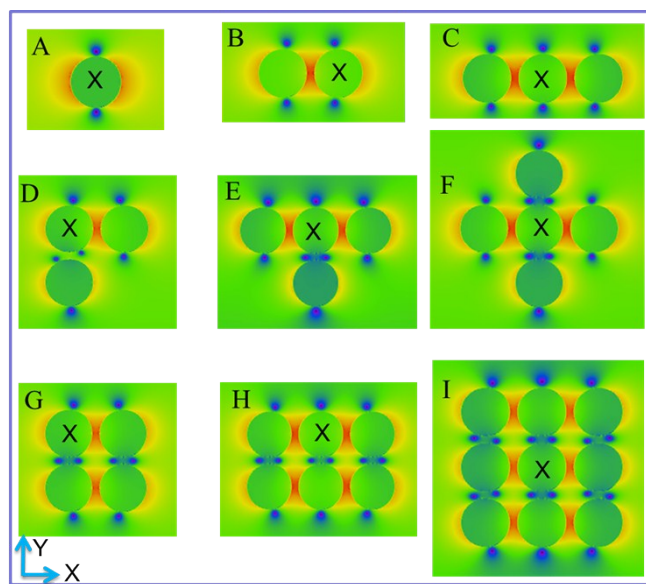

**Fig. S15** FDTD simulation for different number of nanoparticles with the light impinging along  $z$  and polarized in  $x$  direction for all cases (from A to I, number of particles: 1, 2, 3, 3, 4, 5, 4, 6, 9).



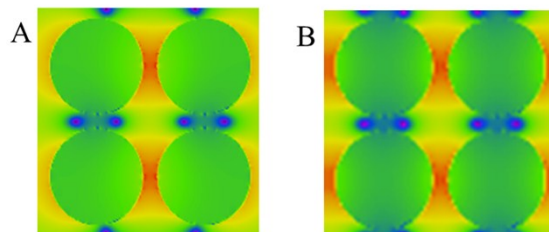

**Fig. S16** Local EM field distributions and intensities for (A) a four-particle system of a  $2 \times 2$  array, (B) a four-particle system in the center of a  $6 \times 6$  array.

## 5. Raman spectra of analytes drop-casted on glass substrate

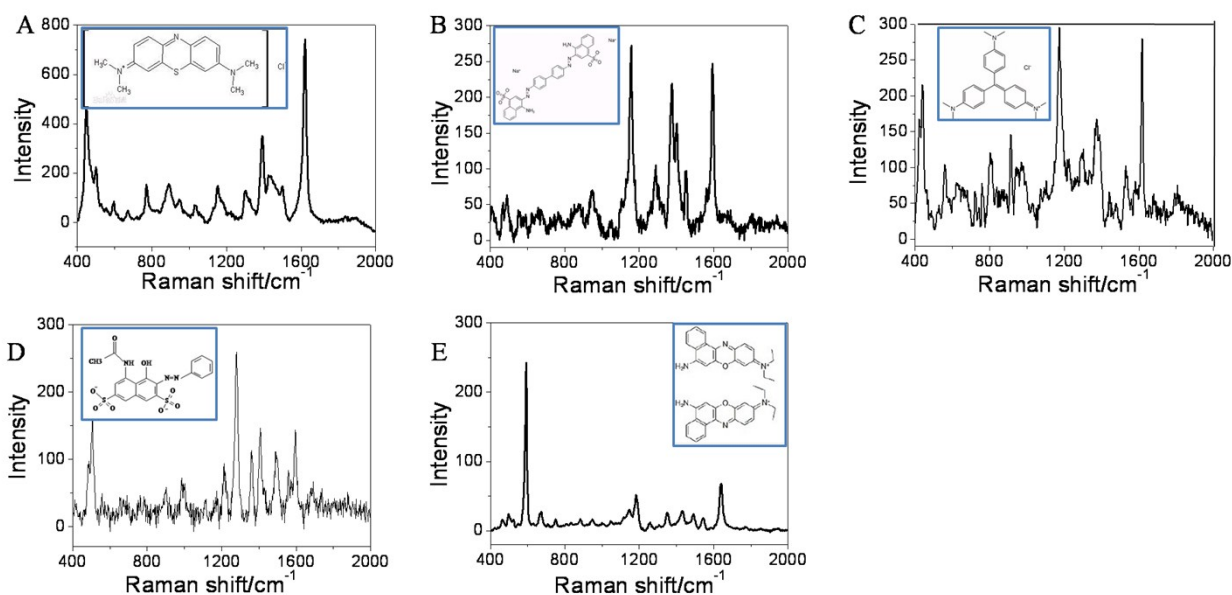

**Fig. S17** Raman spectra of different analytes ( $10^{-2}$  M) drop-casted on the glass substrate: (A) Methylene blue, (B) Congo red, (C) Crystal violet, (D) Acid red, (E) Nile blue (insets show the molecule structure of the analytes).

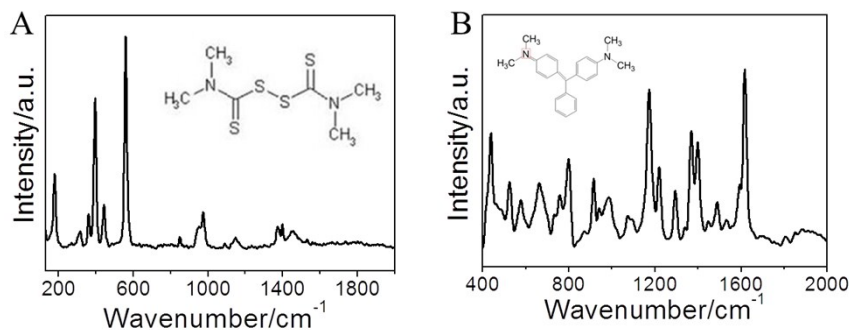

**Fig. S18** Raman spectra of chemical residue analytes on the glass substrate: (A) thiram and (B) malachite green (insets show the molecule structure of the analytes).

## 6. Loading and unloading properties of $(\text{Au}@\text{PAAS}/\text{LDH})_n$ UTFs

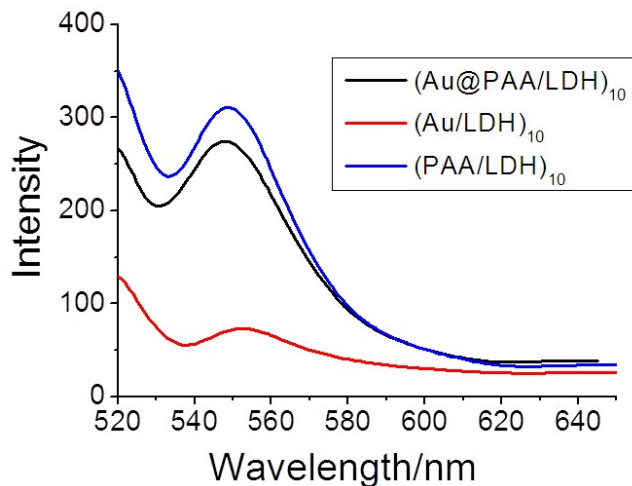

**Fig. S19** Fluorescence emission spectra of  $(\text{Au}@\text{PAAS}/\text{LDH})_{10}$ ,  $(\text{Au}/\text{LDH})_{10}$  and  $(\text{PAAS}/\text{LDH})_{10}$  UTF after immersion in R6G solution.

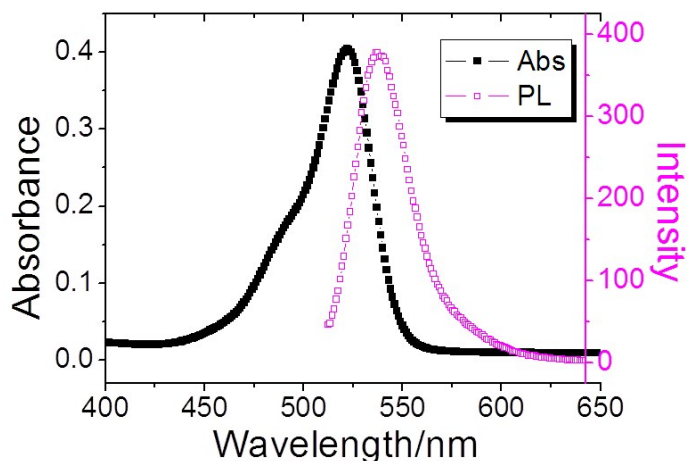

**Fig. S20** UV-vis absorption and fluorescence emission spectra of R6G aqueous solution released from the R6G-loaded UTF.

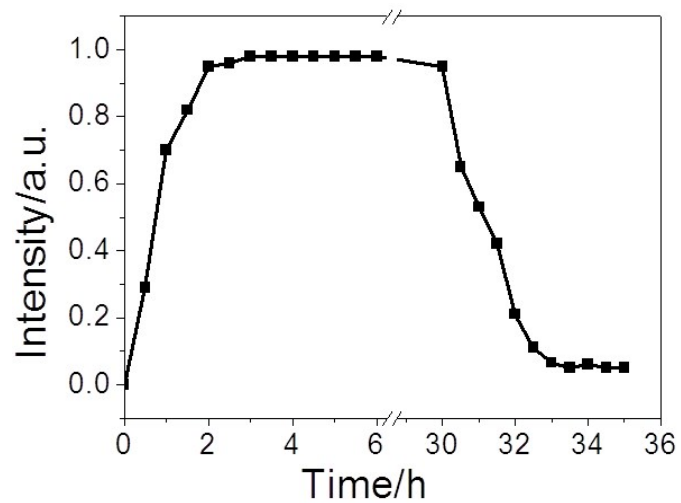

**Fig. S21** Fluorescence intensity changes of  $(\text{Au@PAAS/LDH})_{10}$  UTF in the loading and unloading process as a function of time.

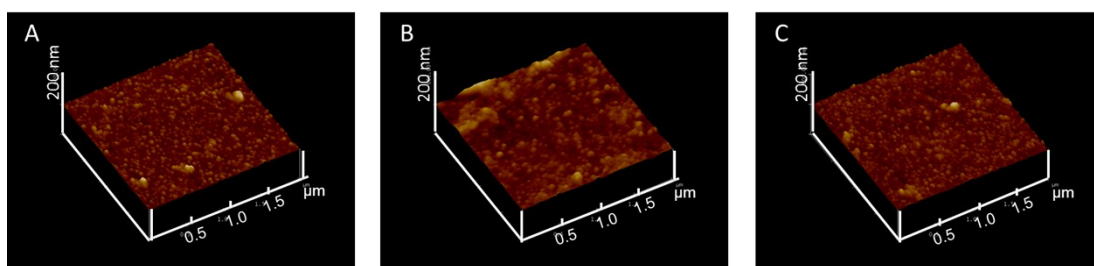

**Fig. S22** AFM images of (A) the original  $(\text{Au@PAAS/LDH})_{10}$  UTF, (B) the UTF after loading R6G, and (C) the UTF after the release of R6G treated by water.
